# Supplementary material for: Anomaly Negative Resistance Phenomena in Highly Epitaxial PrBa0.7Ca0.3Co2O5+δ Thin Films Induced from Superfast Redox Reactions
Source: MDPI journal article supplement (doi:10.3390/catal11121441), 2021-11-26
Supplement: s1 [file s1]

# Supporting information

## **Anomaly Negative Resistance Phenomena in Highly Epitaxial PrBa<sub>0.7</sub>Ca<sub>0.3</sub>Co<sub>2</sub>O<sub>5+δ</sub> Thin Films Induced from Superfast Redox Reactions**

Yumei Luo <sup>1,2</sup>, Xing Xu <sup>2,3</sup>, Yudong Xia <sup>2,4</sup>, Shengli Pang <sup>2,5</sup>, Fen Xu <sup>1</sup>, Myung-Hwan Whangbo <sup>6,7</sup>, Lixian Sun <sup>1,\*</sup> and Chonglin Chen <sup>2,\*</sup>

- <sup>1</sup> Guangxi Collaborative Innovation Center of Structure and Property for New Energy, Guangxi Key Laboratory of Information Materials, Guilin University of Electronic Technology, Guilin 541004, China; luoym@guet.edu.cn (Y.L.); xufen@guet.edu.cn (F.X.)
- <sup>2</sup> Department of Physics and Astronomy, University of Texas at San Antonio, San Antonio, TX 78249, USA; xuxing@mail.tsinghua.edu.cn (X.X.); Ydxia@swjtu.edu.cn (Y.X.); slpang@ujs.edu.cn (S.P.)
- <sup>3</sup> School of Physics and Electronic Information, Gannan Normal University, Ganzhou 341000, China
- <sup>4</sup> School of Physical Science and Technology, Southwest Jiaotong University, Chengdu 611756, China
- <sup>5</sup> Institute for Advanced Materials, Jiangsu University, Zhenjiang 212013, China
- <sup>6</sup> Department of Chemistry, North Carolina State University, Raleigh, NC 27695, USA; whangbo@ncsu.edu
- <sup>7</sup> State Key Laboratory of Structural Chemistry, Fujian Institute of Research on the Structure of Matter (FJIRSM), Chinese Academy of Sciences (CAS), Fuzhou 350002, China
- \* Correspondence: sunlx@guet.edu.cn (L.S.); Chonglin.Chen@utsa.edu (C.C.)

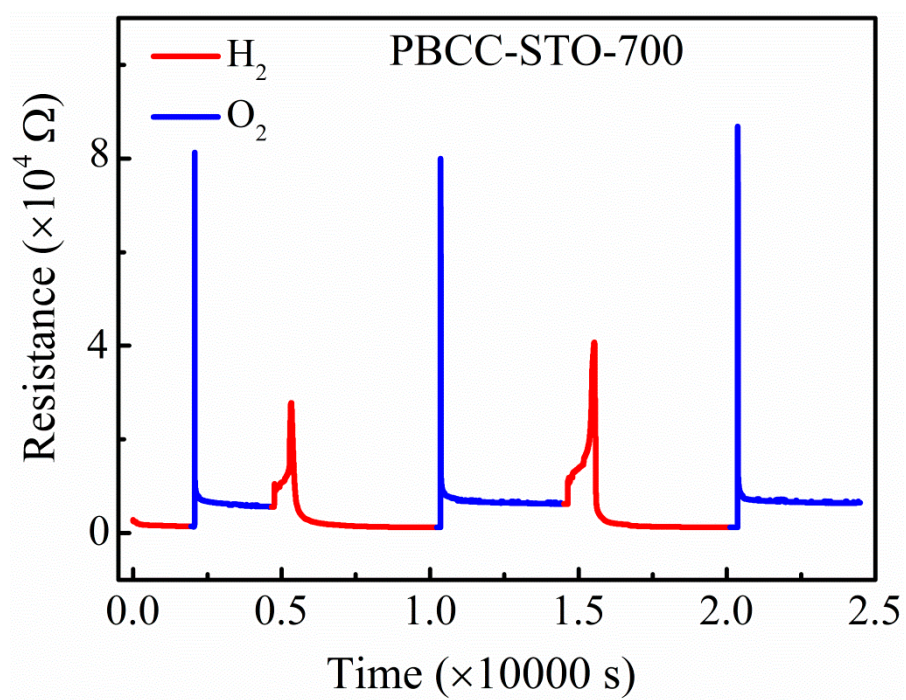

**Figure S1.** R(t) vs. t curves of PBCC thin films grown on (001) STO with switching the flow of H<sub>2</sub> and O<sub>2</sub> gases at 700 °C when applied potential is set as 1.0 V.

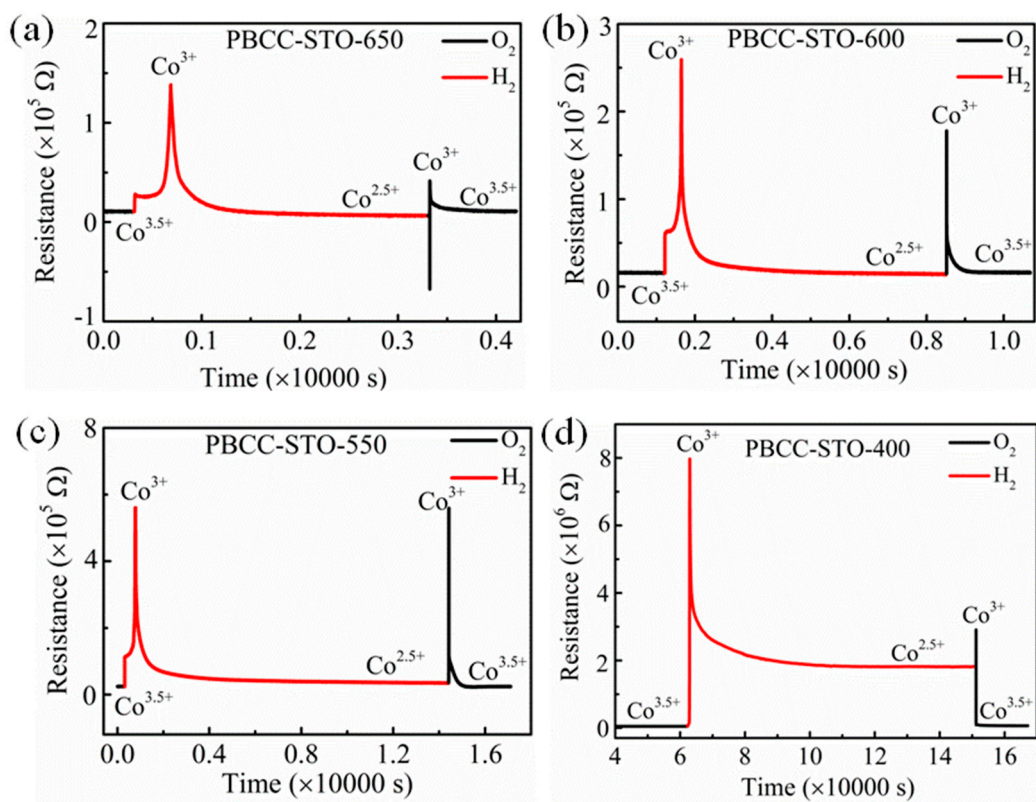

**Figure S2.** Single redox processes of PBCC thin films grown on STO with switching the flow of  $H_2$  and  $O_2$  gases at various temperatures (650, 600, 550, and 400 °C).

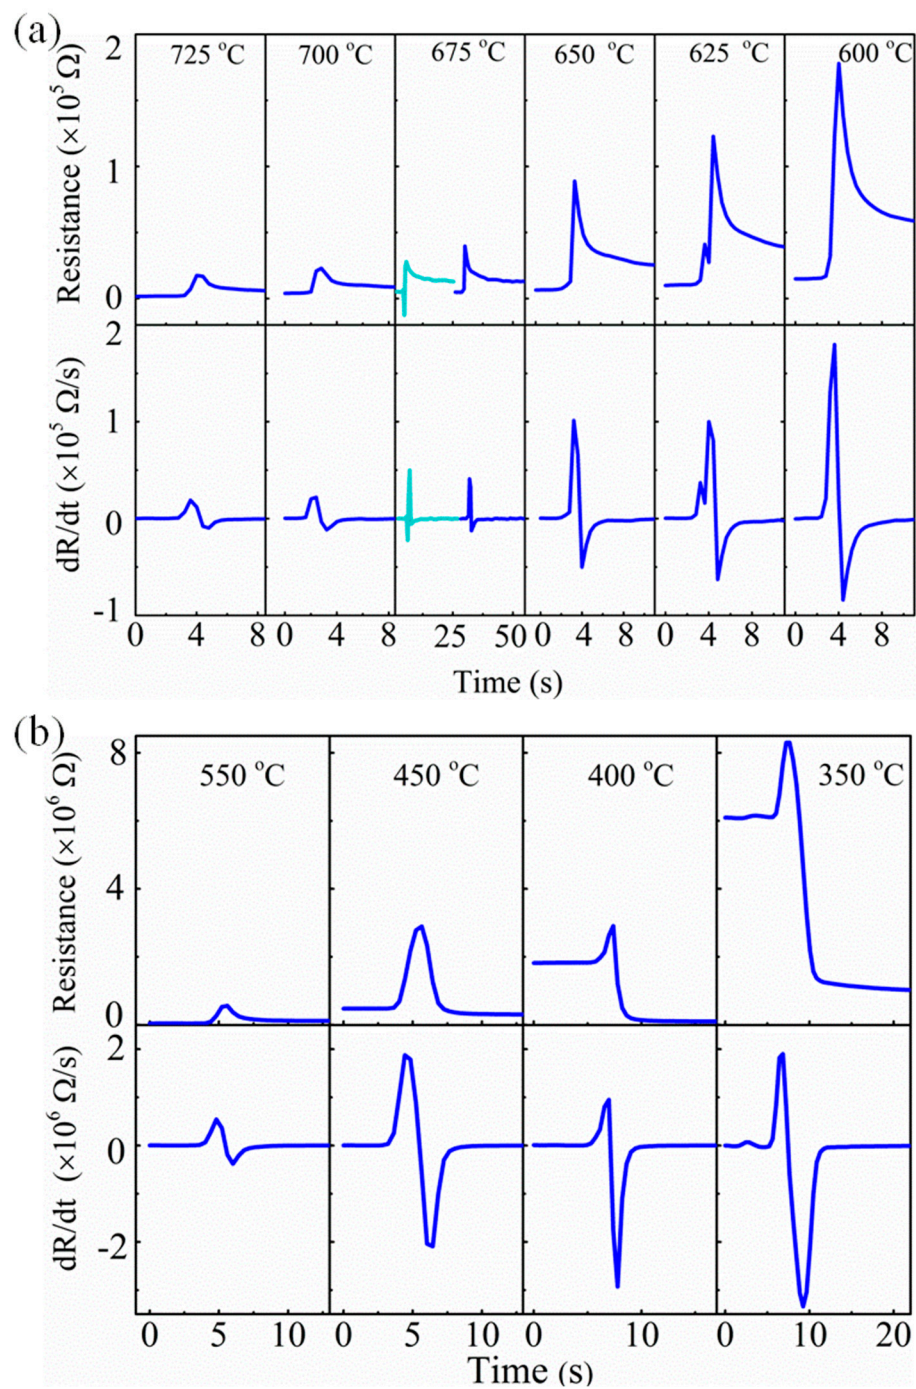

**Figure S3.**  $R(t)$  vs.  $t$  and  $dR(t)/dt$  vs.  $t$  of the epitaxial PBCC thin film under  $O_2$  at various temperatures.



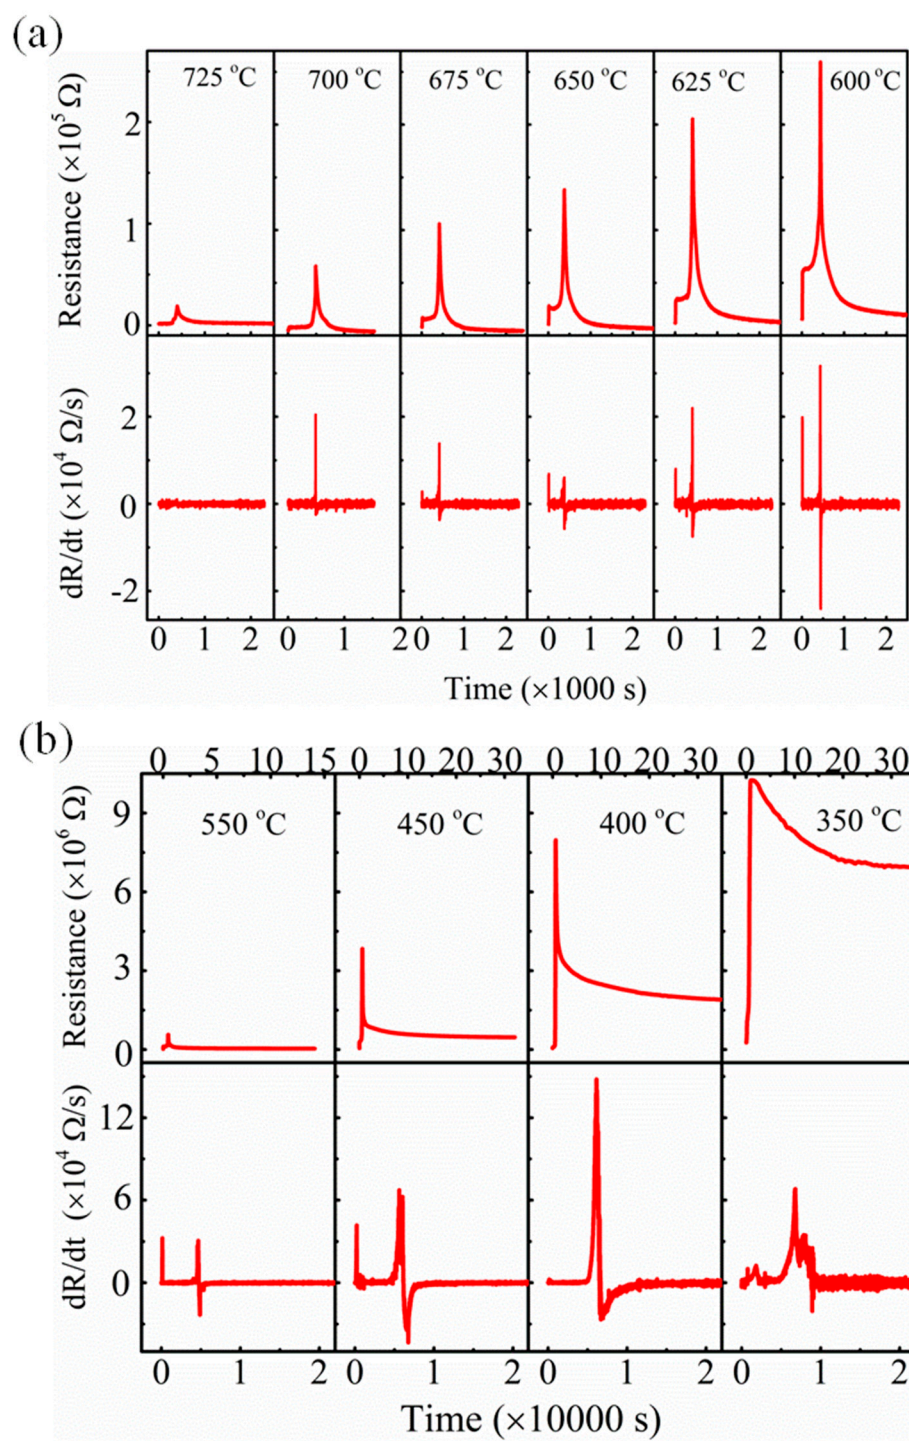

**Figure S4.**  $R(t)$  vs.  $t$  and  $dR(t)/dt$  vs.  $t$  of the epitaxial PBCC thin film under  $H_2$  at various temperatures.
